# Supplementary material for: High adsorption to methylene blue based on Fe 3 O 4 –N-banana-peel biomass charcoal
Source: Royal Society of Chemistry journal article supplement (doi:10.1039/d4ra04973j), 2024-01-01
Supplement: d4ra04973j1.pdf [file d4ra04973j1.pdf]

## High adsorption to methylene blue based on Fe<sub>3</sub>O<sub>4</sub>-N-banana-peel biomass charcoal

Zhu-Xiang Gong<sup>a</sup>, Mfitumucunguzi Steven<sup>a</sup>, Yan-Ting Chen<sup>a</sup>, Li-Zhu Huo<sup>a</sup>, Hao Xu<sup>a</sup>,  
Chao-Fei Guo<sup>a</sup>, Xue-Juan Yang<sup>a</sup>, Yu-Xuan Wang<sup>a,\*</sup>, Xi-Ping Luo<sup>a,b,\*</sup>

<sup>a</sup> College of Chemistry and Materials Engineering, Zhejiang A&F University, Hangzhou 311300, China;

<sup>b</sup> Zhejiang Provincial Key Laboratory of Chemical Utilization of Forestry Biomass, Hangzhou 311300, China

\* Corresponding authors.

E-mail addresses: 20190050@zafu.edu.cn (Y.-X. Wang), luoxiping@zafu.edu.cn (X.-P. Luo).

**Table S1.** Orthogonal design table

| L <sub>9</sub> (4 <sup>3</sup> )<br>orthogonal<br>test design | Factors            |                    |                     |
|---------------------------------------------------------------|--------------------|--------------------|---------------------|
|                                                               | (A) holding        | (B) carbonization  | (C) activator       |
|                                                               | Temperature (min)  | temperature (°C)   | ratio (C/KOH)       |
| 1                                                             | A <sub>1</sub> 60  | B <sub>1</sub> 600 | C <sub>1</sub> 1: 1 |
| 2                                                             | A <sub>1</sub> 60  | B <sub>2</sub> 700 | C <sub>2</sub> 1: 2 |
| 3                                                             | A <sub>1</sub> 60  | B <sub>3</sub> 500 | C <sub>3</sub> 1: 3 |
| 4                                                             | A <sub>2</sub> 90  | B <sub>1</sub> 600 | C <sub>3</sub> 1: 3 |
| 5                                                             | A <sub>2</sub> 90  | B <sub>2</sub> 700 | C <sub>1</sub> 1: 1 |
| 6                                                             | A <sub>2</sub> 90  | B <sub>3</sub> 500 | C <sub>2</sub> 1: 2 |
| 7                                                             | A <sub>3</sub> 120 | B <sub>1</sub> 600 | C <sub>2</sub> 1: 2 |
| 8                                                             | A <sub>3</sub> 120 | B <sub>2</sub> 700 | C <sub>3</sub> 1: 3 |
| 9                                                             | A <sub>3</sub> 120 | B <sub>3</sub> 500 | C <sub>1</sub> 1: 1 |

**Figure S1.** Methylene blue UV absorption spectrum

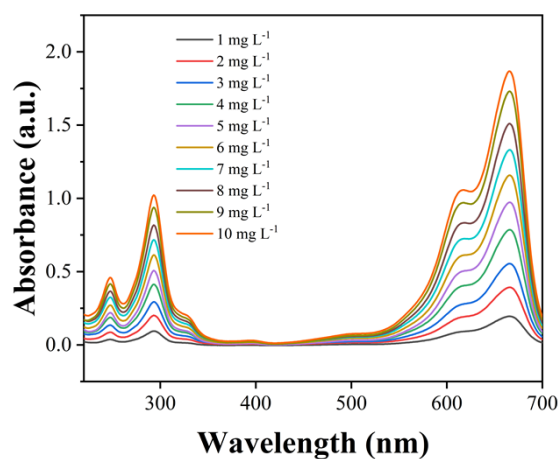

**Figure S2.** Methylene blue dye standard curve diagram

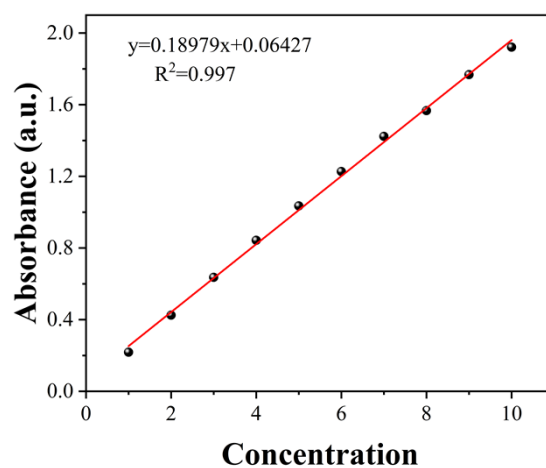

**Table S2.** Orthogonal experimental arrangements

| L <sub>9</sub> (4 <sup>3</sup> )<br>orthogonal<br>test design | Factors                          |                                              |                                |
|---------------------------------------------------------------|----------------------------------|----------------------------------------------|--------------------------------|
|                                                               | (A) holding<br>Temperature (min) | (B) carbonization<br>temperature (°C)        | (C) activator<br>ratio (C/KOH) |
| 1                                                             | A <sub>1</sub> 60                | B <sub>1</sub> 600                           | C <sub>1</sub> 1: 1            |
| 2                                                             | A <sub>1</sub> 60                | B <sub>2</sub> 700                           | C <sub>2</sub> 1: 2            |
| 3                                                             | A <sub>1</sub> 60                | B <sub>3</sub> 500                           | C <sub>3</sub> 1: 3            |
| 4                                                             | A <sub>2</sub> 90                | B <sub>1</sub> 600                           | C <sub>3</sub> 1: 3            |
| 5                                                             | A <sub>2</sub> 90                | B <sub>2</sub> 700                           | C <sub>1</sub> 1: 1            |
| 6                                                             | A <sub>2</sub> 90                | B <sub>3</sub> 500                           | C <sub>2</sub> 1: 2            |
| 7                                                             | A <sub>3</sub> 120               | B <sub>1</sub> 600                           | C <sub>2</sub> 1: 2            |
| 8                                                             | A <sub>3</sub> 120               | B <sub>2</sub> 700                           | C <sub>3</sub> 1: 3            |
| 9                                                             | A <sub>3</sub> 120               | B <sub>3</sub> 500                           | C <sub>1</sub> 1: 1            |
| K <sub>i1</sub>                                               | 185.56                           | 173.29                                       | 158.71                         |
| K <sub>i2</sub>                                               | 193.42                           | 295.03                                       | 205.62                         |
| K <sub>i3</sub>                                               | 184.04                           | 94.70                                        | 198.69                         |
| k <sub>i1</sub>                                               | 61.85                            | 57.76                                        | 52.90                          |
| k <sub>i2</sub>                                               | 64.47                            | 98.34                                        | 68.54                          |
| k <sub>i3</sub>                                               | 61.35                            | 31.57                                        | 66.23                          |
| R <sub>i</sub>                                                | 3.13                             | 66.78                                        | 15.64                          |
| Primary and secondary sequence                                |                                  | B>C>A                                        |                                |
| Excellent level                                               | A <sub>2</sub>                   | B <sub>2</sub>                               | C <sub>2</sub>                 |
| Optimal combination                                           |                                  | A <sub>2</sub> B <sub>2</sub> C <sub>2</sub> |                                |

**Table S3.** Surface area and pore parameters of biochar.

| Sample                               | BET surface area<br>(m <sup>2</sup> g <sup>-1</sup> ) | Pore volume<br>(cm <sup>3</sup> g <sup>-1</sup> ) | Average pore<br>width (nm) |
|--------------------------------------|-------------------------------------------------------|---------------------------------------------------|----------------------------|
| BC                                   | 1,827.9321                                            | 0.5198                                            | 2.7058                     |
| N-BC                                 | 1,616.3728                                            | 0.2416                                            | 3.1968                     |
| Fe <sub>3</sub> O <sub>4</sub> -N-BC | 481.5964                                              | 0.097                                             | 3.6767                     |

**Table S4.** Kinetics and intraparticle diffusion model parameters of MB adsorption on Fe<sub>3</sub>O<sub>4</sub>-N-BC

| Model and<br>parameters | pseudo-first-order<br>dynamics |         | pseudo-second-order<br>dynamics |          | intra-particle diffusion |         |        |        |
|-------------------------|--------------------------------|---------|---------------------------------|----------|--------------------------|---------|--------|--------|
|                         | R <sup>2</sup>                 |         | R <sup>2</sup>                  |          | I                        | II      | III    |        |
| Parameters              | K <sub>1</sub>                 | 0.0397  | K <sub>2</sub>                  | 0.000113 | K <sub>p</sub>           | 27.7533 | 5.7575 | 1.5598 |
|                         | q <sub>e</sub>                 | 618.158 | q <sub>e</sub>                  | 656.086  | C                        | 309.40  | 527.26 | 607.82 |

**Table S5.** Parameters of isotherm models for MB adsorption onto Fe<sub>3</sub>O<sub>4</sub>-N-BC.

| T/K | Langmuir                                  |                            |                | Freundlich |       |                | Temkin                      |                            |                |
|-----|-------------------------------------------|----------------------------|----------------|------------|-------|----------------|-----------------------------|----------------------------|----------------|
|     | q <sub>max</sub><br>(mg g <sup>-1</sup> ) | K<br>(L mg <sup>-1</sup> ) | R <sup>2</sup> | K          | 1/n   | R <sup>2</sup> | B<br>(J mol <sup>-1</sup> ) | A<br>(L mg <sup>-1</sup> ) | R <sup>2</sup> |
| 298 | 651.47                                    | 0.20169                    | 0.9957         | 479.77     | 0.053 | 0.3649         | 32.84                       | 1280.45                    | 0.3652         |
| 308 | 721.14                                    | 0.14459                    | 0.9912         | 460.69     | 0.078 | 0.5135         | 52.32                       | 3.183                      | 0.5142         |
| 318 | 785.26                                    | 0.13621                    | 0.9942         | 466.50     | 0.092 | 0.6219         | 66.10                       | 0.515                      | 0.6230         |

**Table S6.** Thermodynamic fitting parameters.

| Thermodynamic<br>parameter | ΔH <sup>0</sup>         | ΔS <sup>0</sup>                        | ΔG <sup>0</sup> (kJ mol <sup>-1</sup> ) |         |         |
|----------------------------|-------------------------|----------------------------------------|-----------------------------------------|---------|---------|
|                            | (kJ mol <sup>-1</sup> ) | (J mol <sup>-1</sup> K <sup>-1</sup> ) | 298(K)                                  | 303(K)  | 313(K)  |
| MB                         | 11.184                  | 44.623                                 | -2.1136                                 | -2.5598 | -3.0061 |
